# Supplementary material for: The paxillin-plectin-EPLIN complex promotes apical elimination of RasV12-transformed cells by modulating HDAC6-regulated tubulin acetylation
Source: PubMed Central journal article supplement (PMC5794774; doi:10.1038/s41598-018-20146-1), 2018-02-01
Supplement: 41598_2018_20146_MOESM1_ESM.pdf [file 41598_2018_20146_MOESM1_ESM.pdf]

## **Supplementary Information**

**The paxillin-plectin-EPLIN complex promotes apical elimination  
of RasV12-transformed cells by modulating HDAC6-regulated  
tubulin acetylation**

Nobuhiro Kasai, Ailijiang Kadeer, Mihoko Kajita, Sayaka Saitoh, Susumu

Ishikawa, Takeshi Maruyama and Yasuyuki Fujita

Supplementary Figure S1-3

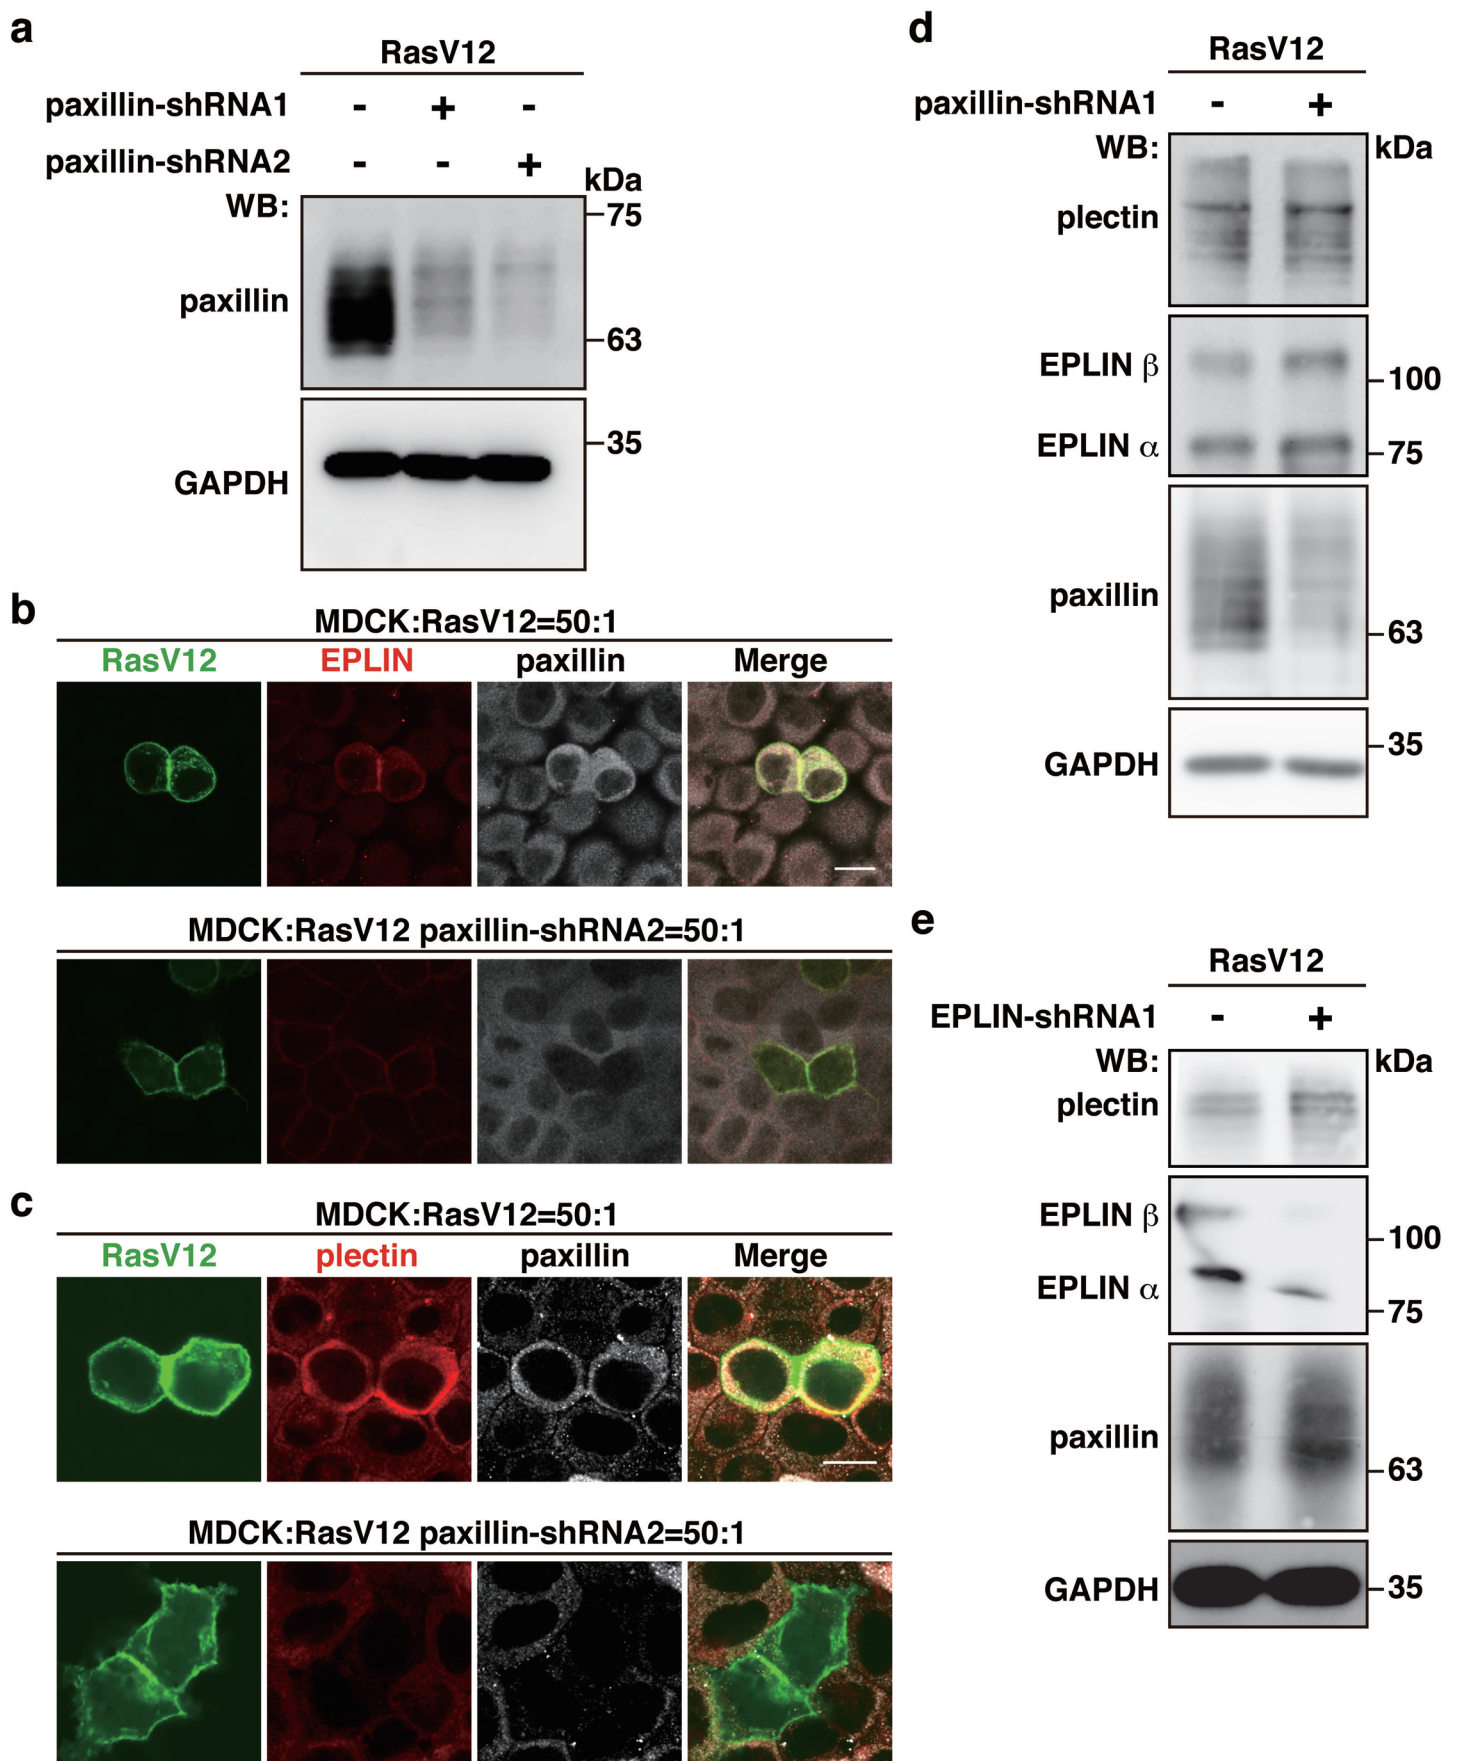

**Figure S1. Paxillin regulates accumulation of EPLIN and plectin in RasV12-transformed cells that are surrounded by normal epithelial cells.** (a) Establishment of MDCK-pTR GFP-RasV12 cells stably expressing paxillin-shRNA1 or -shRNA2. Expression of GFP-RasV12 was induced with tetracycline treatment, followed by western blotting with the indicated antibodies. (b,c) Effect of paxillin-knockdown on EPLIN accumulation (b) or plectin accumulation (c). MDCK-pTR GFP-RasV12 cells or MDCK-pTR GFP-RasV12 paxillin-shRNA2 cells were mixed with normal MDCK cells on collagen gels. Cells were fixed after 16 h incubation with tetracycline and stained with anti-EPLIN (b) or anti-plectin (c) (red), and anti-paxillin (grey) antibodies and Hoechst (blue). Scale bars, 10  $\mu$ m. (d, e) Effect of paxillin- or EPLIN-knockdown on expression of paxillin, plectin and EPLIN in MDCK-pTR GFP-RasV12 cells cultured alone. Cell lysates of the parental or knockdown cells were analysed by western blotting with the indicated antibodies.

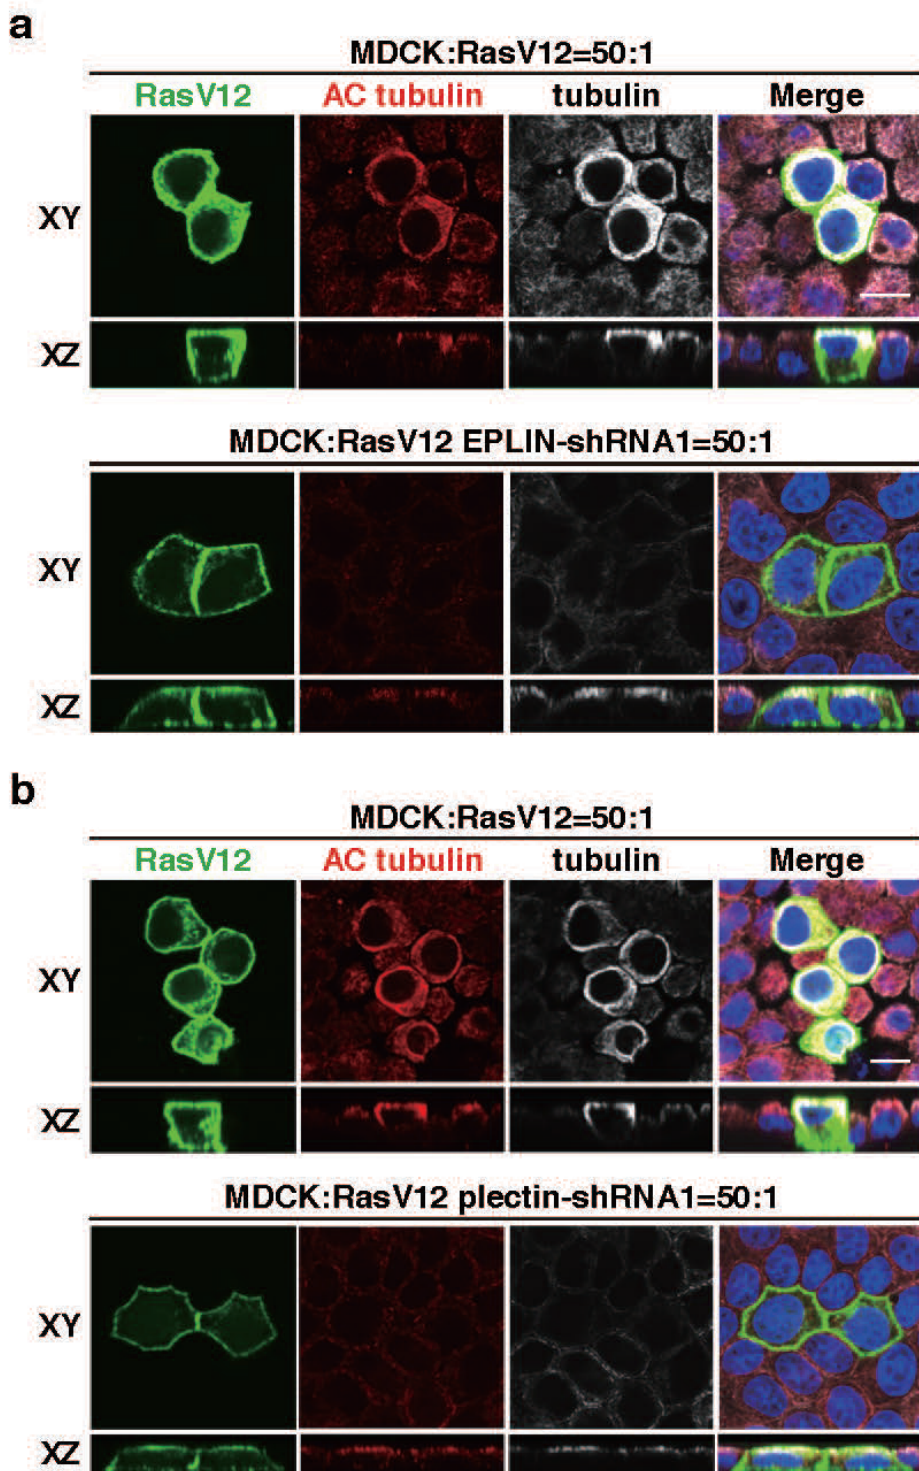

**Figure S2. EPLIN and plectin regulate accumulation of acetylated  $\alpha$ -tubulin in RasV12-transformed cells surrounded by normal epithelial cells.** (a,b) Effect of EPLIN-knockdown (a) or plectin-knockdown (b) on accumulation of acetylated tubulin. MDCK-pTR GFP-RasV12 cells, MDCK-pTR GFP-RasV12 EPLIN-shRNA1 cells or MDCK-pTR GFP-RasV12 plectin-shRNA1 cells were mixed with normal MDCK cells on collagen gels. Cells were fixed after 16 h incubation with tetracycline and stained with anti-acetylated  $\alpha$ -tubulin (red) and anti- $\alpha$ -tubulin (grey) antibodies and Hoechst (blue). Scale bars, 10  $\mu$ m.



**1a)**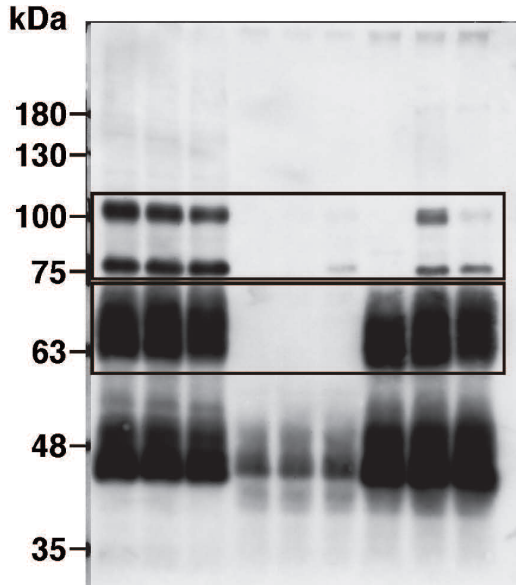**EPLIN, paxillin****S1a)**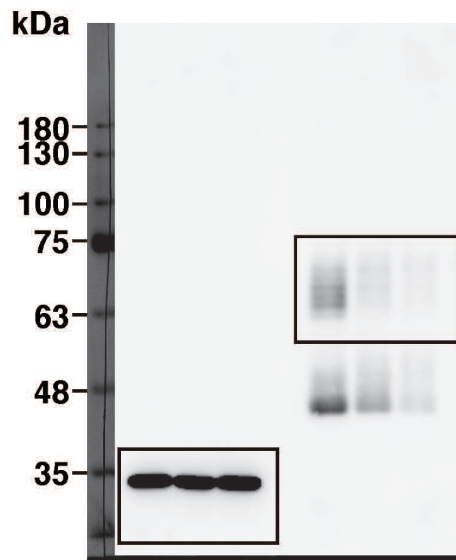**GAPDH, paxillin****S1d)**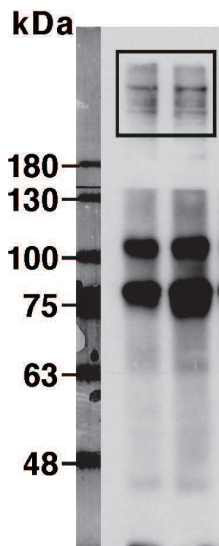**plectin**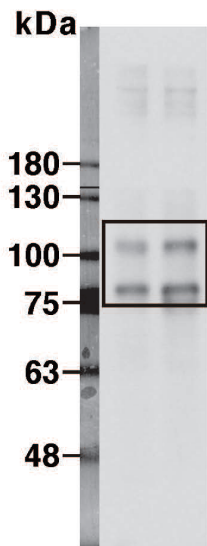**EPLIN**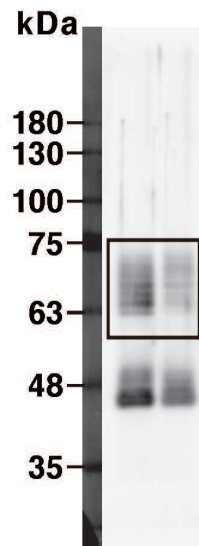**paxillin**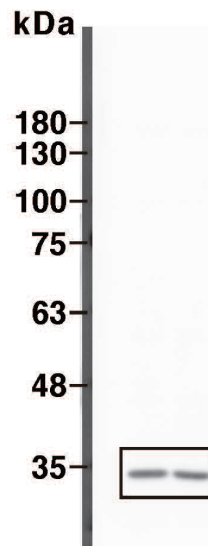**GAPDH****S1e)**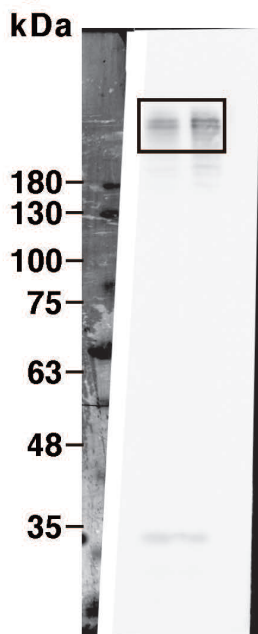**plectin**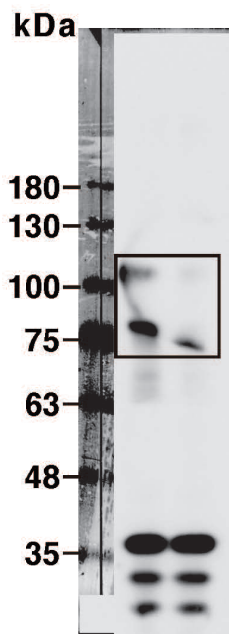**EPLIN**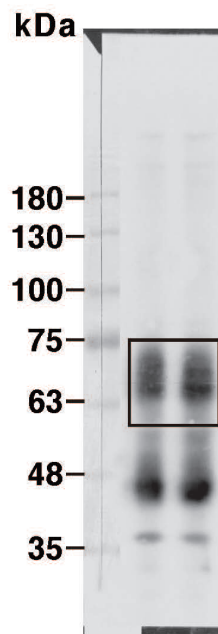**paxillin**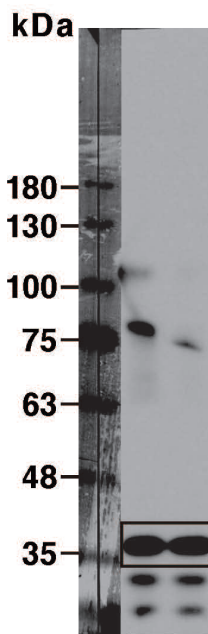**GAPDH****Figure S3. Full-length gels and blots.**
